# Supplementary material for: Cytotoxic Compounds from Marine Fungi: Sources, Structures, and Bioactivity
Source: MDPI journal article supplement (doi:10.3390/md22020070), 2024-01-28
Supplement: s1 [file s1]

# Supplementary Material

## Cytotoxic Compounds from Marine Fungi: Sources, Structures, and Bioactivity

Yukang Gao <sup>1</sup>, Jianjian Wang <sup>1</sup>, Pornphimon Meesakul <sup>2</sup>, Jiamin Zhou <sup>1</sup>, Jinyan Liu <sup>1</sup>,  
Shuo Liu <sup>1</sup>, Cong Wang <sup>1,\*</sup> and Shugeng Cao <sup>2,\*</sup>

<sup>1</sup> Key Laboratory of Chemistry and Engineering of Forest Products, State Ethnic Affairs Commission, Guangxi Key Laboratory of Chemistry and Engineering of Forest Products, Key Laboratory of Universities in Guangxi for Excavation and Development of Ancient Ethnomedicinal Recipes, Guangxi Collaborative Innovation Center for Chemistry and Engineering of Forest Products, Guangxi Minzu University, Nanning 530006, China; 18262343358@163.com (Y.G.); wangjianjian0114@163.com (J.W.); m14795747203@163.com (J.Z.); cheese77877@163.com (J.L.); 18231488462@163.com (S.L.)

<sup>2</sup> Department of Pharmaceutical Sciences, Daniel K. Inouye College of Pharmacy, University of Hawai'i at Hilo, Hilo, HI 96720, USA; pmeesak@hawaii.edu

\* Correspondence: wangcong123206@163.com (C.W.); scao@hawaii.edu (S.C.)

# Table of Contents

|                                                                                                       |          |
|-------------------------------------------------------------------------------------------------------|----------|
| <b>Figure S1.</b> Percentages of antitumor compounds published in different journals (1991–2023)..... | <b>1</b> |
| <b>Table S1.</b> Cytotoxic compounds isolated from marine fungi (1991–2023).....                      | <b>1</b> |

**Figure S1.** Percentages of antitumor compounds published in different journals (1991–2023).

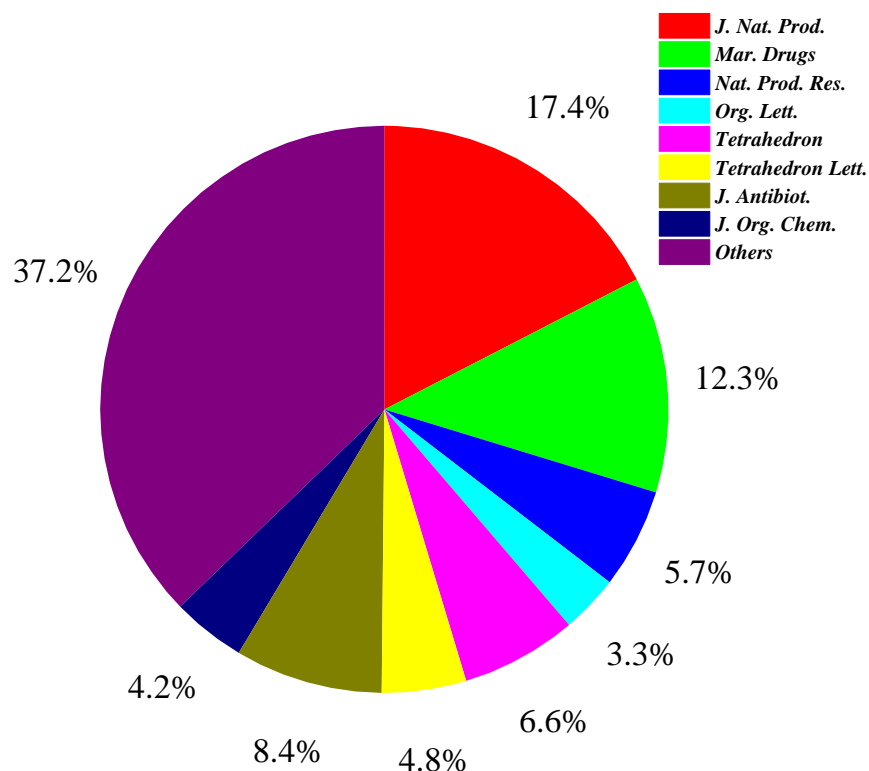

**Table S1.** Cytotoxic compounds isolated from marine fungi (1991–2023).

| Compound                                                 | Producing strain                        | Strain source                                                                          | Architectural feature                                        | Ref. |
|----------------------------------------------------------|-----------------------------------------|----------------------------------------------------------------------------------------|--------------------------------------------------------------|------|
| <b>2.1. Polyketides</b>                                  |                                         |                                                                                        |                                                              |      |
| <b>2.1.1. Macrolides, lactones, pyrones, and lactams</b> |                                         |                                                                                        |                                                              |      |
| 1                                                        | <i>Hyphomycetes</i> sp.                 | Zoanthid <i>Zoanthus</i> sp.,<br>Amami Island, Kagoshima<br>Prefecture, Japan          | Azetinone ( $\alpha,\beta$ -unsaturated-<br>$\beta$ -lactam) | [6]  |
| 2                                                        | <i>Periconia byssoides</i><br>OUPS-N133 | Sea hare <i>Aplysia kurodai</i> ,<br>Osaka Bay of Japan                                | 16-membered macrolide                                        | [7]  |
| 3–5                                                      | <i>Aspergillus ostianus</i><br>01F313   | Unidentified marine<br>sponge, Pohnpei,<br>Federated States of<br>Micronesia           | 14-membered macrolide                                        | [8]  |
| 6                                                        | <i>Cladosporium</i> sp. F14             | Seawater nearby the<br>mangrove stand at Kei<br>Ling Ha Lo Wai, Sai Kung,<br>Hong Kong | nine-membered lactone                                        | [9]  |
| 7–8                                                      | <i>Cladosporium</i> sp.<br>L037         | Brown alga, Seragaki<br>Beach, Okinawa Island                                          | 12-membered macrolide                                        | [10] |

| Compound | Producing strain                    | Strain source                                                                                 | Architectural feature                     | Ref.     |
|----------|-------------------------------------|-----------------------------------------------------------------------------------------------|-------------------------------------------|----------|
| 9–18     | <i>Dendrodochium</i> sp.            | Sea cucumber <i>Holothuria nobilis</i> Selenka, South China Sea                               | 12-membered macrolide                     | [11]     |
| 19–22    | <i>Pestalotiopsis microspore</i> .  | Fresh, healthy fruits of <i>Drepanocarpus lunatus</i>                                         | 14-membered macrolide                     | [12]     |
| 23       | <i>Myrothecium roridum</i> 98F42    | A submerged woody material, Palau                                                             | Macrocyclic trichothecene                 | [13]     |
| 24       | <i>Myrothecium</i> sp. TUF 02F6     | Marine sponge, Indonesia                                                                      | Macrocyclic trichothecene                 | [14]     |
| 25       | <i>Diaporthe</i> sp.                | Submerged rotten leaves of <i>Kandelia candel</i> , Fujian Province of China                  | Isobenzofuranone phthalide                | or [15]  |
| 26       | <i>Penicillium</i> sp. BM923        | Sea sediment sample, Miho, Sizuoka prefecture, Japan                                          | Isobenzofuranone phthalide                | or [16]  |
| 27       | <i>Penicillium</i> sp. ZH58         | Leaves of mangrove tree <i>Avicennia</i> , Dong Sai, Hainan of the South China Sea coast      | Isobenzofuranone phthalide                | or [17]  |
| 28       | <i>Chrysosporium articulatum</i>    | Unidentified dictyoceratid sponge, the coast of Gagudo, Korea                                 | Isobenzofuranone phthalide                | or [18]  |
| 29       | <i>Guignardia</i> sp. 4382          | South-China Sea                                                                               | Isobenzofuranone phthalide                | or [19]  |
| 30       | <i>Acremonium</i> sp. AWA16-1       | Sea mud off Awajishima Island, Japan                                                          | $\gamma$ -lactone- $\delta$ -lactam rings | [20]     |
| 31–32    | <i>Phialocephala</i> sp. FL30r      | Deep-sea sediment                                                                             | Sorbicillinoid benzofuranone              | and [21] |
| 33       | <i>Pseudallescheria boydii</i>      | Inner tissue of sea star <i>Acanthaster planci</i> , Hainan Sanya National Coral Reef Reserve | Isobenzofuranone phthalide                | or [22]  |
| 34–40    | <i>Aspergillus</i> sp. 16-02-1      | Deep-sea sediment sample, Lau Basin hydrothermal vent, southwest Pacific                      | C <sub>9</sub> polyketides                | [23]     |
| 41       | <i>Trichoderma citrinoviride</i>    | Sediment samples, Min River estuary, China                                                    | Dioxolanone ester derivative              | [24]     |
| 42       | <i>Verruculina enalia</i> BCC 22226 | Driftwood, Phetchaburi province, Thailand                                                     | Oxa-spiro derivative                      | [25]     |

| Compound | Producing strain                                       | Strain source                                                                                                     | Architectural feature                      | Ref. |
|----------|--------------------------------------------------------|-------------------------------------------------------------------------------------------------------------------|--------------------------------------------|------|
| 43       | <i>Aigiaus parvus</i> sp.<br>BCC 5311                  | Mangrove wood                                                                                                     | 14-membered resorcylic<br>macrolide        | [26] |
| 44–45    | Zh6-B1                                                 | Bark of <i>Sonneratia apetala</i> ,<br>Zhu Hai, Guangdong,<br>China                                               | 10-membered resorcylic                     | [27] |
| 46–48    | <i>Penicillium</i><br><i>sumatrense</i> MA-92          | Rhizosphere of the<br>mangrove plant <i>Lumnitzera</i><br><i>racemose</i> , WenChang,<br>Hainan Island, China     | Sulfur-containing curvularin<br>derivative | [28] |
| 49       | MF593                                                  | Green alga, Toyama Bay,<br>Japan Sea                                                                              | Ramulosin derivative                       | [29] |
| 50       | <i>Penicillium waksmanii</i><br>Zaleski OUPS-N133      | Brown alga <i>Sargassum</i><br><i>ringgoldianum</i>                                                               | Pyrenocine derivative                      | [30] |
| 51       | <i>Petriella</i> sp. TUBS<br>7961                      | Marine sponge <i>Suberitis</i><br><i>domuncula</i> , Rovinj, Croatia                                              | Pyrenocine derivative                      | [31] |
| 52       | <i>Penicillium</i><br><i>chrysogenum</i> QEN-<br>24S   | Unidentified marine red<br>algal species of the genus<br><i>Laurencia</i>                                         | $\alpha$ -pyrone derivative                | [32] |
| 53       | <i>Penicillium</i><br><i>citreonigrum</i> XT20-<br>134 | Southeast Indian Ocean<br>sediments at 2910 m                                                                     | Pyrenocine derivative                      | [33] |
| 54       | <i>Aspergillus</i> sp. 16-02-<br>1                     | Deep-sea sediment sample,<br>Lau Basin hydrothermal<br>vent, southwest Pacific                                    | C <sub>9</sub> polyketides                 | [23] |
| 55       | <i>Penicillium citrinum</i>                            | Marine sediments, Langqi<br>Island, Fujian, China                                                                 | Alkaloid                                   | [34] |
| 56       | Mixed broth of No.<br>K38 and E33                      | South China sea coast                                                                                             | Diimide derivative                         | [35] |
| 57       | <i>Aspergillus flavus</i>                              | Marine algae <i>Enteromorpha</i><br><i>tubulosa</i> , Putian<br>Pinghai, China                                    | Cyclopiazonic acid                         | [36] |
| 58–59    | <i>Monascus albidus</i> BB3                            | Fresh inner tissue of<br>marine shellfish <i>Meretrix</i><br><i>lusoria</i> , Hailing Island,<br>Yangjiang, China | $\gamma$ -lactam derivative                | [37] |
| 60–61    | <i>Aspergillus oryzae</i>                              | Marine sediments, Langqi<br>Island, Fujian, China                                                                 | Tetracyclic oxindole alkaloids             | [38] |
| 62       | <i>Trichoderma</i><br><i>citrinoviride</i>             | Sediment samples, Min<br>River estuary, China                                                                     | Succinimide derivative                     | [24] |

| Compound | Producing strain                             | Strain source                                                                | Architectural feature               |          | Ref. |
|----------|----------------------------------------------|------------------------------------------------------------------------------|-------------------------------------|----------|------|
| 63       | <i>Aspergillus versicolor</i><br>ZBY-3       | Deep-sea water sample collected at a depth of 800 m in the southeast Pacific | $\gamma$ -lactam derivative         |          | [39] |
| 64       | <i>Aspergillus sydowi</i><br>D2-6            | Marine sediments, Jiaozhou Bay, China                                        | Hetero-spirocyclic $\gamma$ -lactam |          | [40] |
| 65       | <i>Aspergillus fumigatus</i><br>OUPS-T106B-5 | Marine fish <i>Mugil cephalus</i>                                            | Hetero-spirocyclic $\gamma$ -lactam |          | [41] |
| 66–67    | <i>Aspergillus fumigatus</i><br>OUPS-T106B-5 | Marine fish <i>Mugil cephalus</i>                                            | Hetero-spirocyclic $\gamma$ -lactam |          | [42] |
| 68       | <i>Campylocarpon</i> sp.<br>HDN13-307        | Root of mangrove plant <i>S. caseolaris</i>                                  | 2-pyridone derivative               | alkaloid | [43] |
| 69–70    | <i>Aspergillus niger</i>                     | Mediterranean sponge <i>Axinella damicornis</i>                              | 2-pyridone derivative               | alkaloid | [44] |
| 71       | <i>Aspergillus carbonarius</i> WZ-4-11       | Marine sediment, Weizhou island, China                                       | 2-pyridone derivative               | alkaloid | [45] |
| 72       | <i>Aspergillus versicolor</i><br>Y31-2       | Seawater samples, Indian Ocean                                               | Phenylquinolinone                   |          | [46] |
| 73       | <i>Chaunopycnis</i> sp.<br>CMB-MF028         | Rock surfaces in the intertidal zone of Moora Park, Shorncliffe, Queensland  | 2-pyridone derivative               | alkaloid | [47] |
| 74–76    | <i>Chaetomium globosum</i><br>OUPS-T106B-6   | Marine fish <i>Mugil cephalus</i>                                            | Chloro-azaphilone derivative        |          | [48] |
| 77–89    | <i>Chaetomium globosum</i><br>OUPS-T106B-6   | Marine fish <i>Mugil cephalus</i>                                            | Chloro-azaphilone derivative        |          | [49] |
| 80–81    | <i>Chaetomium globosum</i><br>OUPS-T106B-6   | Marine fish <i>Mugil cephalus</i>                                            | Chloro-azaphilone derivative        |          | [50] |
| 82       | <i>Penicillium chrysogenum</i>               | Mediterranean sponge <i>Ircinia fasciculata</i>                              | Sorbicillin derivative              |          | [51] |
| 83–86    | <i>Chaetomium globosum</i><br>OUPS-T106B-6   | Marine fish <i>Mugil cephalus</i>                                            | Chloro-azaphilone derivative        |          | [52] |
| 87–88    | <i>Chaetomium globosum</i><br>OUPS-T106B-6   | Marine fish <i>Mugil cephalus</i>                                            | Azaphilone derivative               |          | [53] |
| 87       | <i>Chaetomium globosum</i><br>HDN151398      | Deep-sea sediment sample, South China Sea                                    | Chloro-azaphilone derivative        |          | [54] |
| 90–91    | <i>Phomopsis tersa</i> FS441                 | Sediment sample collected at the depth of 3000 m in the Indian Ocean         | Chloro-azaphilone derivative        |          | [55] |

| Compound | Producing strain                       | Strain source                                                                                                     | Architectural feature                   | Ref. |
|----------|----------------------------------------|-------------------------------------------------------------------------------------------------------------------|-----------------------------------------|------|
| 92–94    | <i>Chaetomium</i> sp. NA-S01-R1        | Seawater sample at a depth of 4050 m, West Pacific Ocean                                                          | Chloro-azaphilone derivative            | [56] |
| 95–96    | <i>Pyrenochaetopsis</i> sp. FVE-001    | Brown alga <i>Fucus vesiculosus</i> , Kiel Fjord                                                                  | Decalinoylspirotetramic acid derivative | [57] |
| 97       | <i>Mollisia</i> sp. SCSIO41409         | Root bark of <i>Ardisia cornudentata</i> Mez                                                                      | Chlorinated pyrrole-2,5-dione           | [58] |
| 98       | <i>Talaromyces</i> sp. SCSIO 41050     | Mangrove sediment sample, Zhanjiang, coastline of the northern part of Beibu Gulf, China                          | Maleic anhydride derivative             | [59] |
| 99       | <i>Talaromyces</i> sp. HM-4-3-T3       | Sea water, Dongshan Island, China                                                                                 | Benzoquinone                            | [60] |
| 100      | <i>Cladosporium halotolerans</i> FS702 | Sediment sample collected at the depth of 2372 m in the South China Sea                                           | Pyrone derivative                       | [61] |
| 101      | <i>Aspergillus aculeatinus</i> WHF0198 | Sediments collected at the deep-sea of the South China Sea                                                        | Paraherquamide                          | [62] |
| 102      | <i>Alternaria</i> sp. LV52             | Deep-sea cold seep sediment sample collected from the South China Sea                                             | Polyketide                              | [63] |
| 103      | <i>Pestalotiopsis</i> sp. HQD-6        | Leaf of Chinese mangrove plant <i>Rhizophora mucronate</i>                                                        | Polyketide                              | [64] |
| 104      | <i>Trichoderma</i> sp. 307             | Stem bark of <i>Clerodendrum inerme</i> , Zhanjiang Mangrove National Nature Reserve in Guangdong Province, China | Depsidone                               | [65] |
| 105      | <i>Penicillium</i> sp. XL-01           | Bohai Sea                                                                                                         | Verrucosidin derivative                 | [66] |

#### 2.1.2. Chromones, xanthenes, coumarins, benzoquinones, naphthoquinones, anthraquinones and other aromatic compounds

|         |                                  |                                                                                |                 |      |
|---------|----------------------------------|--------------------------------------------------------------------------------|-----------------|------|
| 106–108 | <i>Aspergillus</i> sp. ZA-01     | Sediment collected from the Bohai Sea of Huanghuagang, Hebei Province of China | Prenylxanthenes | [67] |
| 109–111 | <i>Penicillium brocae</i> F97S76 | Tissue homogenate of <i>Zyzzya</i> sp. sponge, Fiji                            | Polyketides     | [68] |

| Compound | Producing strain                             | Strain source                                                                                                            | Architectural feature               | Ref. |
|----------|----------------------------------------------|--------------------------------------------------------------------------------------------------------------------------|-------------------------------------|------|
| 112      | <i>Phomopsis</i> sp. ZSU-H26                 | Stem of the mangrove tree <i>Excoecaria agallocha</i> , Dong Zai, Hainan, China                                          | Naphtho- $\gamma$ -pyrone           | [69] |
| 113      | <i>Trichoderma</i> sp. AF007                 | Seastar <i>Acanthaster planci</i> , Hainan Sanya National Coral Reef Reserve, China                                      | Sorbicillinoid analogue             | [70] |
| 114      | <i>Penicillium oxalicum</i> SCSGAF 0023      | South China Sea gorgonian <i>Muricella flexuosa</i>                                                                      | Dihydrothiophene-condensed chromone | [71] |
| 115–116  | <i>Penicillium oxalicum</i> SCSGAF 0023      | South China Sea gorgonian <i>Muricella flexuosa</i>                                                                      | Dihydrothiophene-condensed chromone | [72] |
| 117      | <i>Penicillium purpurogenum</i> G59          | Soil sample collected at the tideland of Bohai Bay, China                                                                | Chromone                            | [73] |
| 118      | <i>Penicillium purpurogenum</i> G59          | Soil sample collected at the tideland of Bohai Bay, China                                                                | Cyclopentachromone sulfide          | [74] |
| 119      | <i>Cladosporium halotolerans</i> GXIMD 02502 | Coral <i>Porites lutea</i> , Weizhou Islands coral reef in Guangxi Zhuang autonomous region, China                       | Benzopyranone                       | [75] |
| 120      | <i>Pestalotiopsis</i> sp.                    | Leaves of the Chinese Mangrove plant <i>Rhizophora mucronate</i>                                                         | Chromone                            | [76] |
| 121–124  | <i>Rhytidhysteron rufulum</i>                | Leaves of the Thai mangrove plant <i>Bruguiera gymnorrhiza</i>                                                           | Oxygenated chromones                | [77] |
| 125–126  | <i>Penicillium purpurogenum</i> G59          | Soil sample collected at the tideland of Bohai Bay, China                                                                | Chromones                           | [73] |
| 127–129  | <i>Tritirachium</i> sp. SpB081112MEf2        | Marine sponge <i>Pseudoceratina purpurea</i> , offshore sites in Sakuraguchi, Ishigaki Island, Okinawa Prefecture, Japan | Xanthoquinodins                     | [78] |
| 130      | <i>Phomopsis</i> sp. (No. SK7RN3G1)          | Mangrove sediment of Shankou, Hainan, China                                                                              | Xanthone                            | [79] |



| Compound | Producing strain                    | Strain source                                                                                                 | Architectural feature           | Ref. |
|----------|-------------------------------------|---------------------------------------------------------------------------------------------------------------|---------------------------------|------|
| 131      | <i>Phomopsis</i> sp. ZH76           | Stem of <i>Excoecaria agallocha</i> of the mangrove tree Euphorbiaceae, Dong Sai of the South China Sea coast | Xanthone O-glycoside            | [80] |
| 132      | <i>Engyodontium album</i> DFFSCS021 | Marine sediment sample, South China Sea                                                                       | Chromone                        | [81] |
| 133–134  | <i>Aspergillus nomius</i> NC06      | Marine sponge <i>Neopetrosia chaliniformis</i> , Mandeh Island, West Sumatra, Indonesia                       | Oxisterigmatocystin derivatives | [82] |
| 135      | <i>Aspergillus niger</i>            | Mediterranean sponge <i>Axinella damicornis</i>                                                               | Polyketides                     | [44] |
| 136      | <i>Aspergillus flavus</i> 092008    | Root of the mangrove plant <i>Hibiscus tiliaceus</i> (Malvaceae), Wenchang, Hainan province of China          | Aflatoxin                       | [83] |
| 137      | <i>Penicillium</i> sp.              | Deep water (-4380 ft) sedimentX                                                                               | Pentaketide                     | [84] |
| 138      | No. ZSU-H16                         | Leaves of the mangrove tree <i>avicennia</i> from the South China Sea coast                                   | Xanthone                        | [85] |
| 139      | <i>Fusarium</i> sp. ZZF41           | Stem of the mangrove tree <i>Kandelia candel</i> (L.) Druce                                                   | Isoflavone                      | [86] |
| 140      | <i>Fusarium</i> spp. PSU-F135       | Gorgonian sea fan ( <i>Annella</i> sp.) collected near Koh Hin Ran Pet, Suratthani Province                   | Hydronaphthoquinone             | [87] |
| 141      | <i>Nigrospora</i> sp. ZJ-2010006    | Unidentified sea anemone (GX-WZ-20100026), Weizhou coral reef, South China Sea                                | Hydroanthraquinone analogue     | [88] |
| 142      | <i>Acaromyces ingoldii</i> FS121    | Marine sediment sample, South China Sea                                                                       | Pyrandione analogue             | [89] |
| 143      | <i>Penicillium</i> sp. F011         | Korea                                                                                                         | Polyaromatic metabolite         | [90] |
| 144      | <i>Emericella varicolor</i>         | Marine sponge <i>Haliclona valliculata</i> , collected in a depth of 20–30 m at Secca di Capo di Fenza, Italy | Anthraquinone evariquinone      | [91] |

| Compound | Producing strain                     | Strain source                                                                                           | Architectural feature               | Ref.  |
|----------|--------------------------------------|---------------------------------------------------------------------------------------------------------|-------------------------------------|-------|
| 145      | <i>Alternaria</i> sp. ZJ-2008003     | <i>Sarcophyton</i> sp. soft coral, South China Sea                                                      | Anthranoid dimer                    | [92]  |
| 146      | <i>Halorosellinia</i> sp. 1403       | Mangrove                                                                                                | Anthracenedione derivative          | [93]  |
| 147–148  | <i>Alternaria</i> sp. ZJ9-6B         | Mangrove <i>Aegiceras corniculatum</i> , South China Sea                                                | Bianthraquinone derivative          | [94]  |
| 149      | <i>Aspergillus</i> sp. SCSIO F063    | Marine sediment sample, South China Sea                                                                 | Chlorinated anthraquinone           | [95]  |
| 150      | <i>Stemphylium globuliferum</i>      | <i>Mentha pulegium</i> (Lamiaceae), Morocco                                                             | Anthracene derivative               | [96]  |
| 151–152  | <i>Stemphylium globuliferum</i>      | <i>Juncus acutus</i> collected from the shore of the hypersaline lake El Hamra in Wadi el Natrun, Egypt | Tetrahydroanthraquinone derivatives | [97]  |
| 153      | <i>Aspergillus glaucus</i>           | Marine sediment, Fujian, China                                                                          | Nnthaquinone derivative             | [98]  |
| 154      | <i>Emericella varicolor</i>          | Sponge collected in Venezuelan waters of the Caribbean Sea                                              | Polyketides                         | [99]  |
| 155      | <i>Humicola</i> <i>grisea</i> Traaen | Drifting wood, southeastern lagoon of New Caledonia                                                     | Anthraquinone derivative            | [100] |
| 156      | <i>Phialocephala</i> sp. FL30r       | Deep-sea sediment                                                                                       | Polyketides                         | [21]  |
| 157      | <i>Penicillium terrestre</i>         | Marine sediments, Jiaozhou Bay, China                                                                   | Monomeric derivative                | [101] |
| 158      | <i>Trichoderma</i> sp. f-13          | Marine sediment, Fujian, China                                                                          | Polyketides                         | [102] |
| 159      | <i>Penicillium</i> sp. M207142       | Sea sediment                                                                                            | Polyketides                         | [103] |
| 160      | <i>Aspergillus fischeri</i> FS452    | Deep-sea sludge, Indian Ocean                                                                           | Globoscin derivative                | [104] |
| 161      | <i>Alternaria</i> sp. MCCC 3A00467   | Sediment of Pacific Ocean at depth of 5295 m                                                            | Phomalone derivative                | [105] |

| Compound | Producing strain                          | Strain source                                                                                                | Architectural feature        | Ref.  |
|----------|-------------------------------------------|--------------------------------------------------------------------------------------------------------------|------------------------------|-------|
| 162      | <i>Lasiodiplodia</i> sp. 318#             | <i>Excoecaria agallocha</i> of Mangrove National Nature Reserve in Gaoqiao, Zhanjiang city, Guangdong, China | Polyketides                  | [106] |
| 163      | <i>Aspergillus pseudodeflectus</i>        | Seaweed, <i>Sargassum fusiform</i> , Miura Peninsula                                                         | Isochroman derivative        | [107] |
| 164      | <i>Penicillium auratiogriseum</i>         | Sponge <i>Mycale plumose</i> , Qingdao, China                                                                | Aromatic ester               | [108] |
| 165      | <i>Penicillium janczewskii</i> H-TW5/869  | Marine water sample                                                                                          | Quinolinone                  | [109] |
| 166      | <i>Acremonium</i> sp. AWA16-1             | Sea mud, Awajishima Island, Japan                                                                            | Dihydrobenzofuran derivative | [110] |
| 167      | <i>Aspergillus</i> sp. B-F-2              | Marine sediments, Behai Bay, China                                                                           | Diphenyl ether               | [111] |
| 168      | <i>Aspergillus carbonarius</i> WZ-4-11    | Marine sediment, Weizhou island, China                                                                       | Polyketides                  | [45]  |
| 169–176  | <i>Penicillium terrestre</i>              | Marine sediments, Jiaozhou Bay, China                                                                        | Gentisyl alcohol derivative  | [101] |
| 177–178  | <i>Aspergillus versicolor</i> ZLN-60      | Sediment of the Yellow Sea                                                                                   | Gentisyl alcohol derivatives | [112] |
| 179–181  | <i>Aspergillus taichungensis</i> ZHN-7-07 | Root soil of the mangrove plant <i>Acrostichum aureum</i>                                                    | Polyketides                  | [113] |
| 182–183  | <i>Aspergillus aculeatus</i>              |                                                                                                              | Polyketides                  | [114] |
| 184–185  | <i>Penicillium</i> sp. WC-29-5            | Mangrove soil around the roots of <i>Aegiceras corniculatum</i> , Wenchang, Hainan Province of China         | Polyketides                  | [115] |
| 186      | <i>Ascochyta</i> sp. NGB4                 | Floating scrap of festering rope collected at a fishing port in Nagasaki prefecture, Japan                   | Polyketides                  | [116] |
| 187–188  | <i>Rhytidhysterion</i> sp. AS21B          | Leaves of <i>Azima sarmentosa</i> , collected from the mangrove forest in Samutsakhon province, Thailand     | Polyketides                  | [117] |

| Compound | Producing strain                         | Strain source                                                                                                              | Architectural feature       | Ref.  |
|----------|------------------------------------------|----------------------------------------------------------------------------------------------------------------------------|-----------------------------|-------|
| 189      | <i>Phomopsis</i> sp. ZSU-H76             | Stem of the mangrove tree <i>E. agallocha</i> , South China Sea                                                            | Polyketides                 | [118] |
| 190–191  | <i>Sporothrix</i> sp. (#4335)            | Bark of the inshore mangrove tree <i>Kandelia candel</i>                                                                   | Polyketides                 | [119] |
| 192–193  | <i>Penicillium citrinum</i>              | marine sediments collected from Langqi Island, Fujian, China                                                               | Citrinin derivatives        | [120] |
| 194–196  | <i>Penicillium commune</i> QSD-17        | Marine sediment sample, southern China Sea                                                                                 | Azaphilone derivatives      | [121] |
| 197      | <i>Penicillium paneum</i> SD-44          | Marine sediment sample, South China Sea                                                                                    | Triazole carboxylic acid    | [122] |
| 198      | <i>Aspergillus</i> sp.                   | Gorgonian <i>Dichotella gemmacea</i>                                                                                       | Benzylazaphilone derivative | [123] |
| 199–200  | <i>Paecilomyces variotii</i> EN-291      | Red alga <i>Grateloupia turuturu</i>                                                                                       | Indole derivatives          | [124] |
| 201      | <i>Fusarium incarnatum</i> (HKI0504)     | Mangrove plant <i>Aegiceras corniculatum</i>                                                                               | Alkaloid                    | [125] |
| 202–204  | <i>Penicillium raistrichii</i>           | Saline soil sample, Bohai Bay in Zhanhua, China                                                                            | Spiroketal                  | [126] |
| 205      | <i>Pestalotiopsis vaccinii</i>           | A branch of <i>Kandelia candel</i> (L.) Druce (Rhizophoraceae), southern China                                             | Aromatic amine              | [127] |
| 206–207  | <i>Alternaria</i> sp. R6                 | Root of a marine semi-mangrove plant <i>Myoporum bontiodes</i> A. Gray, Leizhou peninsula, Guangdong Province, China       | Resveratrol derivatives     | [128] |
| 208–209  | <i>Lasiodiplodia theobromae</i> ZJ-HQ1   | Leaves of the marine mangrove <i>Acanthus ilicifolius</i> , Zhanjiang Mangrove Nature Reserve in Guangdong Province, China | Chlorinated preussomerins   | [129] |
| 210      | <i>Penicillium citreonigrum</i> XT20-134 | Southeast Indian Ocean sediments at 2910 m                                                                                 | Polyketides                 | [33]  |

| Compound | Producing strain                                        | Strain source                                                                                            | Architectural feature      | Ref.  |
|----------|---------------------------------------------------------|----------------------------------------------------------------------------------------------------------|----------------------------|-------|
| 211–212  | <i>Penicillium aculeatum</i>                            | Red alga <i>Laurencia obtusa</i> ,<br>Egyptian Red Sea                                                   | Sulfonyl metabolites       | [130] |
| 213      | <i>Aspergillus candidus</i><br>OUCMDZ-1051              | Unidentified sponge<br>sample (No. XS-3), Xisha<br>islands, South China Sea                              | Terphenyl                  | [131] |
| 214      | <i>Aspergillus</i><br><i>micronesiensis</i>             | An edible red seaweed<br><i>Kappaphycus alvarezii</i>                                                    | Dibenzospiroketal          | [132] |
| 215      | <i>Eurotium</i> sp. SCSIO<br>F452                       | Sea sediment sample,<br>South China Sea                                                                  | Salicylaldehyde derivative | [133] |
| 216      | <i>Alternaria</i> sp. LV52                              | Deep-sea cold seep<br>sediment sample collected<br>from the South China Sea                              | Polyketides                | [63]  |
| 217      | <i>Penicillium</i> sp.<br>GXIMD 03101                   | Mangrove plant <i>Acanthus</i><br><i>ilicifolius</i> L., South China<br>Sea                              | Xanthene derivative        | [134] |
| 218      | <i>Penicillium</i> sp. ZH16                             | Leaves of mangrove tree<br><i>avicennia</i> from the Dong<br>Sai, Hainan of the South<br>China Sea coast | Furanocoumarin             | [135] |
| 219      | <i>Alternaria tenuis</i><br>Sg17-1                      | Marine alga, Zhoushan<br>Island, China                                                                   | Isocoumarin                | [136] |
| 220–221  | <i>Chrysosporium</i><br><i>articulatum</i>              | Unidentified dictyoceratid<br>sponge, the coast of Gagu-<br>do, Korea                                    | Isocoumarin                | [18]  |
| 222      | No. dz17                                                | South China Sea                                                                                          | Isocoumarin                | [137] |
| 223      | <i>Phomopsis</i> sp. Gx-4                               | Mangrove sediment,<br>ZhuHai, Guangdong,<br>China                                                        | Isocoumarin                | [138] |
| 224      | <i>Penicillium</i> sp.<br>091402                        | Root of the mangrove<br><i>Bruguiera sexangula</i> Linn,<br>Qinglan Port, Hainan,<br>China               | Isocoumarin                | [139] |
| 225–226  | <i>Penicillium</i><br><i>chrysogenum</i> SCSIO<br>41001 | Deep sea sediment of the<br>Indian Ocean                                                                 | Isocoumarin                | [140] |

### 2.1.3. Polyketides (Other cyclic polyketides)

|         |                                                      |                                                       |                    |       |
|---------|------------------------------------------------------|-------------------------------------------------------|--------------------|-------|
| 227–229 | <i>Penicillium</i> sp.                               | Marine alga <i>Emeromorpha</i><br><i>intestinalis</i> | Cyclic polyketides | [141] |
| 230–232 | <i>Trichoderma</i><br><i>harzianum</i> OUPS-<br>N115 | Marine sponge<br><i>Halichondria okadai</i>           | Cyclic polyketides | [142] |

| Compound | Producing strain                           | Strain source                                                                                       | Architectural feature       | Ref.      |
|----------|--------------------------------------------|-----------------------------------------------------------------------------------------------------|-----------------------------|-----------|
| 233      | <i>Trichoderma</i> sp.<br>GIBH-Mf082       | Marine sediment, South China Sea                                                                    | Cyclopentenone              | [143]     |
| 234–236  | <i>Gymnascella dankaliensis</i>            | Sponge <i>Halichondria japonica</i> , Osaka Bay, Japan                                              | Polyketides                 | [144]     |
| 237–239  | <i>Gymnascella dankaliensis</i>            | Sponge <i>Halichondria japonica</i> , Osaka Bay, Japan                                              | Polyketides                 | [145,146] |
| 240–242  | <i>Gymnascella dankaliensis</i>            | Sponge <i>Halichondria japonica</i> , Osaka Bay, Japan                                              | Polyketides                 | [147]     |
| 243–244  | <i>Gymnascella dankaliensis</i>            | Sponge <i>Halichondria japonica</i> , Osaka Bay, Japan                                              | Polyketides                 | [148]     |
| 245–246  | <i>Gymnascella dankaliensis</i>            | Sponge <i>Halichondria japonica</i> , Osaka Bay, Japan                                              | Polyketides                 | [149]     |
| 247–248  | <i>Periconia byssoides</i> OUPS-N133       | Sea hare <i>Aplysia kurodai</i>                                                                     | Polyketides                 | [150]     |
| 249–253  | <i>Periconia byssoides</i> OUPS-N133       | Sea hare <i>Aplysia kurodai</i>                                                                     | Polyketides                 | [151]     |
| 254      | <i>Aspergillus</i> sp.                     | Mussel <i>Mytilus edulis</i> , Toyama Bay                                                           | Polyketides                 | [152]     |
| 255      | <i>Penicillium terrestre</i>               | Marine sediment, Jiaozhou Bay, Qingdao                                                              | Polyketides                 | [153]     |
| 256–259  | <i>Trichoderma reesei</i>                  | Marine mud in the tideland of Lianyungang, China                                                    | Polyketides                 | [154]     |
| 260–263  | <i>Phialocephala</i> sp.<br>FL30r          | Underwater sample                                                                                   | Sorbicillin trimers         | [155,156] |
| 264      | <i>Penicillium citrinum</i> SpI080624G1f01 | Marine sponge <i>Demospongiae</i> collected offshore of Ishigaki island, Okinawa. Prefecture, Japan | Sorbicillinoid              | [157]     |
| 265–266  | <i>Penicillium terrestre</i>               |                                                                                                     | Polyketides                 | [158]     |
| 267      | <i>Trichoderma</i> sp. f-13                | Marine sediment, Fujian, China                                                                      | Polyketide                  | [102]     |
| 268–270  | <i>Penicillium</i> sp. F23–2               | Deep sea                                                                                            | Sorbicillinoids             | [159]     |
| 271–272  | <i>Penicillium terrestre</i>               | Marine sediments, Jiaozhou Bay, China                                                               | Chlorinated sorbicillinoids | [160]     |
| 273–274  | <i>Chaetomium globosum</i> OUPS-T106B-6    | Marine fish, Mugil cephalus                                                                         | Polyketides                 | [161]     |
| 275–278  | <i>Chaetomium globosum</i> OUPS-T106B-6    | Marine fish <i>Mugil cephalus</i>                                                                   | Polyketides                 | [50]      |

| Compound                                    | Producing strain                           | Strain source                                                                             | Architectural feature              | Ref.      |
|---------------------------------------------|--------------------------------------------|-------------------------------------------------------------------------------------------|------------------------------------|-----------|
| 279                                         | <i>Chaetomium globosum</i><br>OUPS-T106B-6 | Marine fish, Mugil cephalus                                                               | Polyketides                        | [162]     |
| 280                                         | <i>Penicillium</i> 303#                    | Sea water, Zhanjiang Mangrove National Nature Reserve in Guangdong Province, China        | Polyketides                        | [163]     |
| 281                                         | <i>Penicillium sclerotiorum</i> M-22       | Rotted leaf sample collected on the west coast of Haikou, Hainan province, China          | Azaphilonidal derivative           | [164]     |
| 282                                         | <i>Rhizopus</i> sp. 2-PDA-61               | Bryozoan <i>Bugula</i> sp., Jiaozhou Bay, China                                           | Pyran derivative                   | [165]     |
| 283–284                                     | <i>Talaromyces</i> sp. ZH-154              | Stem bark of <i>Kandelia candel</i> , Qi'ao Island of Zhuhai, China                       | Polyketides                        | [166]     |
| 285                                         | <i>Penicillium raistrickii</i>             | Saline soil collected along the coast of Bohai Bay in Zhanhua, Shandong Province of China | Polyketides                        | [167]     |
| 286                                         | <i>Penicillium</i> sp. F23–2               | Deep sea                                                                                  | Nitrogen-containing sorbicillinoid | [159]     |
| 287                                         | <i>Aspergillus sulphureus</i> KMM 4640     | Marine sediments                                                                          | Decaline derivative                | [168]     |
| 288                                         | <i>Penicillium</i> sp. F11                 | Deep marine                                                                               | Polyketides                        | [169]     |
| 289                                         | <i>Penicillium purpurogenum</i> G59        |                                                                                           | Polyketides                        | [170]     |
| 290                                         | <i>Isaria feline</i> KMM 4639              | Marine sediments collected at a depth of 10 m, South China Sea, coast of Vietnam          | Polyketides                        | [171]     |
| 291                                         | <i>Penicillium citrinum</i> SCSIO41402     | Marine alga <i>Coelarthrum</i> sp. collected in Yongxing Island, South China Sea          | Sorbicillinoid                     | [172]     |
| 292                                         | <i>Eurotium</i> sp. SCSIO F452             | Sea sediment sample, South China Sea                                                      | Salicylaldehyde derivative         | [133]     |
| <b>2.1.4. Linear polyketides and others</b> |                                            |                                                                                           |                                    |           |
| 293–294                                     | <i>Gliocladium roseum</i> KF-1040          | Seaweed sample collected at Yap Island                                                    | Linear polyketides                 | [173–175] |

| Compound | Producing strain                            | Strain source                                                                                                              | Architectural feature | Ref.  |
|----------|---------------------------------------------|----------------------------------------------------------------------------------------------------------------------------|-----------------------|-------|
| 295–296  | <i>Aspergillus flavipes</i>                 | Sea anemone <i>Anthopleura xanthogrammica</i>                                                                              | Linear polyketides    | [176] |
| 297      | <i>Gliocladium</i> sp. L049                 | Sea grass <i>Syringodium isoetifolium</i> , Maeda Cape, Okinawa Island                                                     | Linear polyketides    | [177] |
| 298      | <i>Aspergillus</i> sp. 16-02-1              | Deep-sea sediment sample, Lau Basin hydrothermal vent, southwest Pacific                                                   | Linear polyketides    | [23]  |
| 299      | <i>Pestalotiopsis clavispora</i>            | Mangrove plant <i>Rhizophora harrisonii</i> , Port Harcourt (Nigeria)                                                      | Linear polyketides    | [178] |
| 300      | <i>Acremonium citrinum</i> . MMF4           | Sediment at the root of mangrove plant <i>Kandelia obovata</i> , Yunxiao county, Zhangzhou City, Fujian Province, in China | Linear polyketides    | [179] |
| 301      | <i>Fusarium graminearum</i> FM1010          | Shallow-water volcanic rock, Richardson's Beach, Big Island, Hawaii                                                        | Linear polyketides    | [180] |
| 302–307  | <i>Pestalotiopsis heterocornis</i> XWS03F09 | Sponge <i>Phakellia fusca</i> collected from the Xisha Islands, close to Sansha City, Hainan Province, China               | Polyketides           | [181] |

## 2.2. Peptides

### 2.2.1. Diketopiperazine

|         |                                          |                                                                                      |                   |           |
|---------|------------------------------------------|--------------------------------------------------------------------------------------|-------------------|-----------|
| 308     | <i>Aspergillus niger</i>                 | Caribbean <i>Hyrtios</i> sponge                                                      | Diketopiperazines | [182]     |
| 309–329 | <i>Leptosphaeria</i> sp. OUPS-4          | Marine alga <i>Sargassum tortile</i>                                                 | Diketopiperazines | [183–188] |
| 330–333 | <i>Exserohilum rostratum</i> CNK-630     | Cyanobacterial mat collected off the northwest corner of Lanai Island, Hawaii        | Diketopiperazines | [189]     |
| 334–336 | <i>Oidiodendron truncatum</i> GW3-13     | Soil collected under lichens near the Great Wall station (Chinese Antarctic station) | Diketopiperazines | [190]     |
| 337     | <i>Fusarium chlamydosporum</i> OUPS-N124 | Marine alga <i>Carpopeltis affinis</i>                                               | Diketopiperazines | [191]     |



| Compound | Producing strain                       | Strain source                                                                                       | Architectural feature | Ref.  |
|----------|----------------------------------------|-----------------------------------------------------------------------------------------------------|-----------------------|-------|
| 338      | <i>Gliocladium roseum</i><br>OUPS-N132 | The sea hare <i>Aplysia kurodai</i><br>collected in coast of Kata                                   | Diketopiperazines     | [192] |
| 339      | <i>Phoma</i> sp.<br>OUCMDZ-1847        | Mangrove plant <i>Kandelia candel</i> (Rhizophoraceae)<br>Wenchang, Hainan<br>Province, China       | Diketopiperazines     | [193] |
| 340–341  | <i>Penicillium brocae</i><br>MA-231    | Mangrove                                                                                            | Diketopiperazines     | [194] |
| 342      | <i>Penicillium purpurogenum</i> G59    | Soil sample collected at the<br>tideland of Bohai Bay                                               | Diketopiperazines     | [195] |
| 343–345  | <i>Aspergillus nidulans</i><br>SD-531  | Deep-sea sediment<br>collected in cold seep<br>region (at a depth 1331 m)<br>in the South China Sea | Diketopiperazines     | [196] |
| 346–349  | <i>Aspergillus</i> sp. EGF<br>15-0-3   | Soft coral                                                                                          | Diketopiperazines     | [197] |
| 350–351  | <i>Penicillium</i> sp. F23-2           | Underwater sample                                                                                   | Diketopiperazines     | [198] |
| 352–353  | <i>Eurotium</i> sp. SCSIO<br>F452      | South China Sea sediment<br>sample                                                                  | Diketopiperazines     | [199] |

### 2.2.2. Cyclic peptides

|         |                                      |                                                                                                                                             |                          |       |
|---------|--------------------------------------|---------------------------------------------------------------------------------------------------------------------------------------------|--------------------------|-------|
| 354     | <i>Fusarium</i> sp. CNL-<br>292      | Seagrass <i>Halodule wrightii</i>                                                                                                           | Cyclic pentadepsipeptide | [200] |
| 355     | <i>Fusarium</i> sp. CNL-<br>619      | Green alga <i>Avrainvillea</i> sp.,<br>southeast end of St.<br>Thomas at Bovoni Cay,<br>United States Virgin<br>Islands                     | Cyclic depsipeptide      | [201] |
| 356–357 | <i>Scytalidium</i> sp. CNC-<br>310   | Green alga <i>Halimeda</i> sp.<br>collected from a patch reef<br>at a depth of 15 m from the<br>northern end of Long<br>Island, the Bahamas | Cyclic heptapeptides     | [202] |
| 358     | <i>Zygosporium masonii</i><br>CNK458 | Marine cyanobacterium,<br>island of Maui, Hawaii                                                                                            | Cyclic pentadepsipeptide | [203] |
| 359     | Strain No. 1962                      | Leaf of <i>Kandelia candel</i> from<br>an estuarine mangrove,<br>Hong Kong                                                                  | Cyclic pentadepsipeptide | [204] |
| 360     | <i>Trichoderma reesei</i><br>YZ48-08 |                                                                                                                                             | Cyclotetrapeptide        | [205] |

| Compound | Producing strain                       | Strain source                                                                                                 | Architectural feature  | Ref.  |
|----------|----------------------------------------|---------------------------------------------------------------------------------------------------------------|------------------------|-------|
| 361      | <i>Clonostachys</i> sp.<br>ESNA-A009   | Unidentified marine sponge, Japan                                                                             | Cyclodepsipeptide      | [206] |
| 362–363  | <i>Spicellum roseum</i><br>193H5       | Sponge <i>Ectyplasia perox</i>                                                                                | Cyclohexadepsipeptides | [207] |
| 364–365  | <i>Scopulariopsis brevicaulis</i>      | Marine sponge <i>Tethya aurantium</i> , Limski Fjord, Croatia                                                 | Cyclodepsipeptides     | [208] |
| 366      | <i>Aspergillus sclerotiorum</i> PT06-1 | Putian SeaSalt Field, Fujian, China                                                                           | Cyclic hexapeptide     | [209] |
| 367      | <i>Bionectria ochroleuca</i>           | Leaf tissues of the plant <i>Sonneratia caseolaris</i> (Sonneratiaceae) from Hainan Island (China)            | Cyclicpetide           | [210] |
| 368–369  | <i>Acremonium persicinum</i> SCSIO 115 | Marine sediment sample, South China Sea                                                                       | Cycloheptapeptides     | [211] |
| 370      | <i>Phaeosphaeriopsis</i> sp. S296      | Sediment of a mangrove plant <i>Bruguiera gymnorhiza</i> , Techeng Isle, Zhanjiang, Guangdong Province, China | Cyclodecadepsipeptide  | [212] |

### 2.2.3. Linear peptides

|         |                                            |                                                          |                                  |       |
|---------|--------------------------------------------|----------------------------------------------------------|----------------------------------|-------|
| 371–372 | <i>Acremonium</i> sp.<br>021172cKZ         | Marine sponge <i>Teichaxinella</i> sp., Papua New Guinea | N-methylated linear octapeptides | [213] |
| 373     | <i>Aspergillus versicolor</i>              | Marine sponge <i>Petrosia</i> sp.                        | Linear peptide                   | [214] |
| 374–377 | <i>Simplicillium obclavatum</i> EIODSF 020 | Marine sediment sample, East Indian Ocean                | Linear peptides                  | [215] |

## 2.3. Terpenoids and sterols

### 2.3.1. Sesquiterpenoids

|         |                                        |                                                                       |                                 |       |
|---------|----------------------------------------|-----------------------------------------------------------------------|---------------------------------|-------|
| 378     | <i>Penicillium</i> sp.<br>SS080624SCf1 | Tunicate <i>D. molle</i> , Ishigaki Island, Okinawa Prefecture, Japan | Sesquiterpenoid                 | [216] |
| 379–380 | <i>Aspergillus</i> sp.                 | Marine sponge <i>Xestospongia testudinaria</i> , South China Sea      | Sesquiterpenoid dimers          | [217] |
| 381     | <i>Chondrostereum</i> sp. nov. SF002   | Soft coral <i>Sarcophyton tortuosum</i> , the South China Sea         | Triquinane-type sesquiterpenoid | [218] |

| Compound | Producing strain                         | Strain source                                                                                                | Architectural feature                   | Ref.  |
|----------|------------------------------------------|--------------------------------------------------------------------------------------------------------------|-----------------------------------------|-------|
| 382      | <i>Chondrostereum</i> sp. nov. SF002     | Soft coral <i>Sarcophyton tortuosum</i> , the South China Sea                                                | Sesquiterpenoid                         | [219] |
| 383      | <i>Penicillium</i> sp. FJ-1              | Marine plant of <i>Avicennia marina</i> , Fujian, China                                                      | Sesquiterpenoid                         | [220] |
| 384–385  | <i>Penicillium</i> sp. PR19 N-1          | Marine sludge collected from Prydz Bay (-1000 m), Antarctica                                                 | Eremophilane-type sesquiterpenes        | [221] |
| 386–387  | <i>Ascotricha</i> sp. ZJ-M-5             | Mud sample collected on the coastal beach in Fenghua County, Zhejiang Province, China                        | Sesquiterpenoids                        | [222] |
| 388      | <i>Aspergillus flocculosus</i>           | Sediment sample, Nha Trang Bay, South China Sea, Vietnam                                                     | Sesquiterpenoid                         | [223] |
| 389      | <i>Aspergillus ochraceus</i> Jcma1F17    | Marine alga <i>Coelarthrum</i> sp., Paracel Islands, South China Sea                                         | Nitrobenzoyl sesquiterpenoid            | [224] |
| 390      | <i>Penicillium chrysogenum</i> LD-201810 | Marine red alga <i>Grateloupia turuturu</i> , Qingdao, China                                                 | Sesquiterpenoid                         | [225] |
| 391–392  | <i>Aspergillus niger</i>                 | Marine sponge <i>Dysidea</i> sp., South China Sea                                                            | Sesquiterpenoids                        | [226] |
| 393–394  | <i>Aspergillus flavipes</i> 297          | Seawater collected at coastal zone of Yantai, China                                                          | Sesquiterpenoids                        | [227] |
| 396      | Unidentified fungi                       | Marine sponge <i>Jaspis</i> aff. <i>Johnstoni</i>                                                            | Sesquiterpenoid                         | [228] |
| 397      | <i>Acremonium neocaledoniae</i>          | Drifting wood, Gadgi Bay, New Caledonia                                                                      | Sesquiterpenoid                         | [229] |
| 398–401  | <i>Talaromyces flavus</i>                | Leaves of mangrove plant <i>Sonneratia apetala</i> collected on the coastal saltmarsh of the South China Sea | Sesquiterpenoids                        | [230] |
| 402      | <i>Penicillium</i> sp. PR19N-1           | Marine sludge collected from Prydz Bay (-1000 m), Antarctica                                                 | Chloro-trinoreremophilane sesquiterpene | [231] |

### 2.3.2. Diterpenoids

| Compound | Producing strain                                | Strain source                                                                 | Architectural feature          | Ref.  |
|----------|-------------------------------------------------|-------------------------------------------------------------------------------|--------------------------------|-------|
| 403      | <i>Arthrinium</i> sp. 9287                      | Mediterranean sponge<br><i>Geodia cydonium</i> , Adriatic Ocean               | Diterpenoids                   | [232] |
| 404–405  | <i>Epicoccum</i> sp. HS-1                       |                                                                               | Pimarane diterpenes            | [233] |
| 406–409  | <i>Eutypella scoparia</i> FS26                  | Marine sediment sample collected at the depth of 139 m in the South China Sea | Oxygenated pimarane diterpenes | [234] |
| 410      | <i>Eutypella</i> sp. FS46                       | Marine sediment sample collected at the depth of 292 m in the South China Sea | Pimarane-type diterpene        | [235] |
| 411      | <i>Penicillium brefeldianum</i> strain WZW-F-69 | Soil near an abalone aquaculture base of Fujian province, China               | Indole diterpenoid             | [236] |
| 412–413  | <i>Aspergillus wentii</i> EN-48                 | Unidentified marine brown algal species of the genus <i>Sargassum</i>         | Tetranorlabdane diterpenoids   | [237] |
| 414      | <i>Aspergillus terreus</i> GX73B                | Coastal salt marsh of the South China Sea, Guangxi Province                   | Diterpenoids                   | [238] |
| 415      | <i>Aspergillus wentii</i> SD-310                | Deep sea sediment sample, South China Sea at a depth of 2038 m                | Diterpenoids                   | [239] |
| 416–420  | <i>Aspergillus wentii</i> SD-310                | Deep-sea sediment sample                                                      | Diterpenoids                   | [240] |
| 421–423  | <i>Penicillium</i> sp.                          | Deep water sediment sample, East Pacific                                      | Breviane spiroditerpenoids     | [241] |
| 424–429  | <i>Penicillium</i> sp. F23-2                    | Underwater sample                                                             | Diterpenoids                   | [198] |
| 430      | <i>Aspergillus candidus</i> HDN15-152           | Sponge collected from Pulitzer Bay, Antarctica                                | Indole diterpenoids            | [242] |
| 431–433  | <i>Acremonium striatisporum</i> KMM 4401        | Holothurian <i>Eupentacta fraudatrix</i>                                      | Diterpene glycosides           | [243] |
| 434–437  | <i>Acremonium striatisporum</i> KMM 4401        | Holothurian <i>Eupentacta fraudatrix</i>                                      | Diterpene glycosides           | [244] |

### 2.3.3. Sesterterpenoids

|         |                                      |                                                                       |                |       |
|---------|--------------------------------------|-----------------------------------------------------------------------|----------------|-------|
| 438–439 | <i>Fusarium heterosporum</i> CNC-477 | Driftwood collected from a mangrove habitat at Sweetings Cay, Bahamas | Sesterterpenes | [245] |
|---------|--------------------------------------|-----------------------------------------------------------------------|----------------|-------|

| Compound | Producing strain                     | Strain source                                                                                 | Architectural feature | Ref.  |
|----------|--------------------------------------|-----------------------------------------------------------------------------------------------|-----------------------|-------|
| 440–446  | <i>Fusarium heterosporum</i> CNC-477 | Driftwood collected from a mangrove habitat at Sweetings Cay, Bahamas                         | Sesterterpenes        | [246] |
| 447–449  | <i>Aspergillus</i> CNK-371           | Unidentified sponge collected at 40 feet from Manele Bay, Lanai, Hawaii                       | Meroterpenoids        | [247] |
| 450–451  | <i>Phomopsis tersa</i> FS441         | Deep-sea sediment sample                                                                      | Meroterpenoids        | [248] |
| 452      | <i>Aspergillus insuetus</i> (OY-207) | The Mediterranean sponge <i>Psammocinia</i> sp., Sdot-Yam, Israel                             | Meroterpenoid         | [249] |
| 453–454  | <i>Aspergillus</i> sp. 094102        | Zoanthid <i>Zoanthus</i> collected at Ayamaru Cape, Amami Island, Kagoshima Prefecture, Japan | Sesterterpenes        | [250] |
| 455–456  | <i>Penicillium</i> sp. 303#          | Sea water, Zhanjiang Mangrove National Nature Reserve in Guangdong Province, China            | Meroterpenoids        | [163] |

#### 2.3.4. Sterols

|         |                                         |                                                                                                         |             |       |
|---------|-----------------------------------------|---------------------------------------------------------------------------------------------------------|-------------|-------|
| 457     | <i>Gymnacella dankaliensis</i>          | Sponge <i>Halichondria japonica</i> , Osaka Bay, Japan                                                  | Sterols     | [251] |
| 458–461 | <i>Gymnascella dankaliensis</i>         | Sponge <i>Halichondria japonica</i> , Osaka Bay, Japan                                                  | Sterols     | [252] |
| 462–467 | <i>Rhizopus</i> sp.                     | Marine <i>Bugula</i> sp., Jiaozhou Bay, China                                                           | Ergosterols | [253] |
| 468     | <i>Penicillium chrysogenum</i> QEN-24S  | Unidentified marine red algal species of the genus <i>Laurencia</i>                                     | Sterols     | [254] |
| 469–470 | <i>Aspergillus niger</i> MA-132         | A fresh healthy sample of the mangrove plant <i>Avicennia marina</i>                                    | Sterols     | [255] |
| 471–473 | <i>Penicillium purpurogenum</i> G59     | Soil sample collected at the tideland of Bohai Bay, China                                               | Sterols     | [256] |
| 474     | <i>Penicillium citrinum</i> SCSIO 41017 | Sponge <i>Callyspongia</i> sp. collected from the sea area near Xuwen County, Guangdong Province, China | Sterol      | [257] |

| Compound                                                           | Producing strain                                | Strain source                                                                            | Architectural feature | Ref.  |
|--------------------------------------------------------------------|-------------------------------------------------|------------------------------------------------------------------------------------------|-----------------------|-------|
| 475                                                                | <i>Aspergillus flavus</i><br>YJ07-1             | Bohai Sea                                                                                | Oxygenated steroid    | [258] |
| <b>2.4. Hybrids</b>                                                |                                                 |                                                                                          |                       |       |
| <b>2.4.1. Hybrids of polyketides and peptides (or amino acids)</b> |                                                 |                                                                                          |                       |       |
| 476–477                                                            | <i>Penicillium</i><br><i>fellutanum</i> Btource | Marine fish <i>Apogon</i><br><i>endekataenia</i> Bleeker                                 | Hybrids               | [259] |
| 478–483                                                            | <i>Aspergillus fumigatus</i>                    | Marine fish <i>Pseudolabrus japonicus</i>                                                | Hybrids               | [260] |
| 484–486                                                            | <i>Gliocladium roseum</i><br>OUPS-N132          | The sea hare <i>Aplysia kurodai</i><br>collected in coast of Kata                        | Hybrids               | [192] |
| 487–488                                                            | <i>Penicillium aurantiogriseum</i> SP0-19       | Sponge <i>Mycale plumose</i><br>(Mycalidae), Jiaozhou Bay,<br>Qingdao, China             | Hybrids               | [261] |
| 489–490                                                            | <i>Acrostalagmus luteoalbus</i> SCSIO<br>F457   | Deep-sea sediment                                                                        | Hybrids               | [262] |
| 491–492                                                            | <i>Penicillium purpurogenum</i> G59             |                                                                                          | Hybrids               | [170] |
| 493–495                                                            | <i>Leptosphaeria</i> sp.<br>OUPS-4              | Marine alga <i>Sargassum tortile</i>                                                     | Hybrids               | [183] |
| 496                                                                | <i>Trichoderma virens</i><br>CNL910             | A sample of the marine<br>ascidian <i>Didemnum mole</i> ,<br>Madang, Papua New<br>Guinea | Hybrids               | [263] |
| 497–498                                                            | <i>Microsporum gypseum</i> CNL-629              | cf. A sample of the bryozoan<br><i>Bugula</i> sp., U.S. Virgin<br>Islands                | Hybrids               | [264] |
| 499–501                                                            | <i>Penicillium</i> sp.                          | Marine alga <i>Enteromorpha intestinalis</i> , Tanabe Bay,<br>Japan                      | Hybrids               | [265] |
| 502–506                                                            | <i>Penicillium</i> sp.<br>OUPS-79               | Marine alga <i>Enteromorpha intestinalis</i>                                             | Hybrids               | [266] |
| 507                                                                | <i>Phomopsis asparagi</i>                       | Sponge <i>Rhaphidophlus juniperina</i>                                                   | Hybrids               | [267] |
| 508–510                                                            | <i>Spicaria elegans</i><br>KLA03                | Marine sediments,<br>Jiaozhou Bay, China                                                 | Hybrids               | [268] |
| 511–512                                                            | <i>Spicaria elegans</i><br>KLA03                | Marine sediments,<br>Jiaozhou Bay, China                                                 | Hybrids               | [269] |
| 513                                                                | <i>Spicaria elegans</i><br>KLA03                | Marine sediments,<br>Jiaozhou Bay, China                                                 | Hybrids               | [270] |

| Compound | Producing strain                              | Strain source                                                                                                       | Architectural feature      | Ref.  |
|----------|-----------------------------------------------|---------------------------------------------------------------------------------------------------------------------|----------------------------|-------|
| 514–515  | <i>Spicaria elegans</i><br>KLA03              | Marine sediments,<br>Jiaozhou Bay, China                                                                            | Hybrids                    | [271] |
| 516–517  | <i>Spicaria elegans</i><br>KLA03              | Marine sediments,<br>Jiaozhou Bay, China                                                                            | Hybrids                    | [272] |
| 518      | <i>Xylaria</i> sp. SCSIO156                   | Marine sediment, South<br>China Sea                                                                                 | Hybrids                    | [273] |
| 519–522  | <i>Phoma</i> sp.                              | Giant jellyfish <i>Nemopilema</i><br><i>nomurai</i>                                                                 | Hybrids                    | [274] |
| 523      | <i>Aspergillus oryzae</i>                     | Red Sea sediments<br>collected off Jeddah, Saudi<br>Arabia                                                          | Hybrids                    | [275] |
| 524      | <i>Aspergillus versicolor</i>                 | Marine sponge <i>Petrosia</i> sp.                                                                                   | Lipopeptide                | [276] |
| 525      | <i>Aspergillus terreus</i><br>SCSGAF0162      | The tissue of the gorgonian<br><i>Echinogorgia aurantiaca</i> ,<br>Sanya, Hainan Province,<br>China                 | Cyclic tetrapeptide        | [277] |
| 526–527  | <i>Aspergillus clavatus</i><br>C2WU           | Hydrothermal vent crab<br><i>Xenograpsus testudinatus</i> ,<br>Kueishantao, Taiwan                                  | Cyclodepsipeptides         | [278] |
| 528–534  | <i>Penicillium</i><br><i>purpurogenum</i> G59 | Soil sample collected at the<br>tideland of Bohai Bay,<br>China                                                     | Lipopeptides               | [279] |
| 535      | <i>Aspergillus</i>                            | Brown algal species<br>belonging to the genus<br><i>Sargassum</i> collected off<br>Helgoland, North Sea,<br>Germany | Cyclotriptide              | [280] |
| 536      | <i>Aspergillus versicolor</i><br>SCSIO 41016  | Marine sponge                                                                                                       | Diketopiperazine alkaloids | [281] |
| 537      | <i>Aspergillus sydowii</i><br>MCCC 3A00324    | Deep sea sediment (2246<br>meters), South Atlantic<br>Ocean                                                         | Hybrids                    | [282] |
| 538      | <i>Penicillium citrinum</i>                   | Deep-sea sediment sample                                                                                            | Pentacyclic alkaloid       | [283] |
| 539–540  | <i>Aspergillus</i> sp.                        | Marine-submerged<br>decaying wood                                                                                   | Lipopeptidyl benzophenones | [284] |

#### 2.4.2. Hybrids of polyketides and terpenoids (or steroids or isoprenyls)

|     |                                          |                                                                  |                                       |       |
|-----|------------------------------------------|------------------------------------------------------------------|---------------------------------------|-------|
| 541 | <i>Aspergillus versicolor</i><br>CNC 327 | Caribbean green alga<br><i>Penicillus capitatus</i>              | Sesquiterpenoid nitrobenzoyl<br>ester | [285] |
| 542 | <i>Gymnacella</i><br><i>dankaliensis</i> | Sponge <i>Halichondria</i><br><i>japonica</i> , Osaka Bay, Japan | Hybrid                                | [252] |

| Compound | Producing strain                           | Strain source                                                                                                           | Architectural feature      | Ref.  |
|----------|--------------------------------------------|-------------------------------------------------------------------------------------------------------------------------|----------------------------|-------|
| 543      | <i>Hypoxylon croceum</i><br>M97-25         | Driftwood in a mangrove<br>estuary in the<br>Everglades/Florida                                                         | Sordarin derivative        | [286] |
| 544      | <i>Xylariaceous</i> LL-<br>07H239          |                                                                                                                         | Eremophilane sesquiterpene | [287] |
| 545      | <i>Chaetomium globosum</i>                 | Fresh algal sample,<br>Qingdao coastline,<br><i>Polysiphonia urceolata</i>                                              | Hybrids                    | [288] |
| 546–547  | <i>Aspergillus ustus</i><br>8009           | Marine sponge <i>Suberites</i><br><i>domuncula</i> , Adriatic Sea                                                       | Drimane sesquiterpenoids   | [289] |
| 548–549  | <i>Phoma</i> sp.                           | Marine sponge <i>Ectyplasia</i><br><i>perox</i> , the Caribbean Sea,<br>Dominica                                        | Prenylated polyketides     | [290] |
| 550      | <i>Paraconiothyrium</i> sp.<br>193H12      | Marine sponge <i>Ectyplasia</i><br><i>perox</i> , the Caribbean Sea,<br>Dominica                                        | Hybrid                     | [291] |
| 551      | <i>Aspergillus insuetus</i><br>(OY-207)    | The Mediterranean sponge<br><i>Psammocinia</i> sp., Sdot-<br>Yam, Israel                                                | Drimane sesquiterpenoids   | [249] |
| 552      | <i>Aspergillus ustus</i>                   | Rhizosphere soil of the<br>mangrove plant<br><i>Acrostichum aureum</i> ,<br>Guangxi Province, China                     | Drimane sesquiterpenoids   | [292] |
| 553–554  | <i>Aspergillus ustus</i><br>094102         | Rhizosphere soil of the<br>mangrove plant <i>Bruguiera</i><br><i>gymnorhiza</i> , Wenchang,<br>Hainan Province of China | Drimane sesquiterpenoids   | [293] |
| 555      | <i>Penicillium</i> sp.<br>F00120           | Sediment of the northern<br>South China Sea                                                                             | Sesquiterpene quinone      | [294] |
| 556      | <i>Penicillium</i> sp.<br>C9408-3          | Deep sea sediment sample<br>collected at a depth of 5115<br>m                                                           | Breviane spiroditerpenoid  | [295] |
| 557      | <i>Neosartorya laciniosa</i><br>KUFC 7896  | Coastal forest soil,<br>Samaersarn island,<br>Chonburi Province,<br>Thailand                                            | Hybrids                    | [296] |
| 558–560  | <i>Aspergillus versicolor</i><br>OUPS-N136 | Sea urchin <i>Anthocidaris</i><br><i>crassispina</i> collected in<br>Tanabe Bay in Wakayama,<br>Japan                   | Hybrids                    | [297] |



| Compound | Producing strain                       | Strain source                                                                                                 | Architectural feature             | Ref.  |
|----------|----------------------------------------|---------------------------------------------------------------------------------------------------------------|-----------------------------------|-------|
| 561      | <i>Cryptosphaeria</i> sp.<br>CNL-523   | Unidentified ascidian collected in the Bahamas                                                                | Ester-substituted sesquiterpenoid | [298] |
| 562      | <i>Penicillium concentricum</i> ZLQ-69 | Water sample taken from the coast of the Bohai Sea in Binzhou, Shandong Province, China                       | Meroterpene                       | [299] |
| 563–566  | <i>Aspergillus flavus</i> CF13-11      | Marine sediment collected from the Bohai Sea                                                                  | Drimane sesquiterpene esters      | [300] |
| 567      | <i>Paecilomyces</i> sp.                | Saprophytic bark of mangrove from the Taiwan Strait                                                           | Hybrids                           | [301] |
| 568–569  | <i>Penicillium expansum</i> 091006     | Surface-sterilized roots of the mangrove plant <i>Excoecaria agallocha</i> , Wenchang, Hainan Province, China | Hybrids                           | [302] |
| 570–571  | <i>Penicillium expansum</i> 091006     | Surface-sterilized roots of the mangrove plant <i>Excoecaria agallocha</i> , Wenchang, Hainan Province, China | Hybrids                           | [303] |
| 572      | <i>Aspergillus ustus</i> 094102        | Rhizosphere soil of the mangrove plant <i>Bruguiera gymnorhiza</i> , Wenchang, Hainan Province of China       | Isochromane derivative            | [293] |
| 573      | <i>Nigrospora</i> sp. MA75             | Stem of the semi-mangrove plant <i>Pongamia pinnata</i>                                                       | Hybrids                           | [304] |
| 574–575  | <i>Stachylidium</i> sp. 220            | Sponge <i>Callyspongia</i> sp. cf. <i>C. flammea</i> , Bear Island, Sydney, Australia                         | Phthalide derivatives             | [305] |
| 576–577  | <i>Stachylidium</i> sp. 220            | Sponge <i>Callyspongia</i> sp. cf. <i>C. flammea</i> , Bear Island, Sydney, Australia                         | Phthalimidine derivatives         | [306] |
| 578–588  | <i>Alternaria</i> sp. JJY-32           | Sponge <i>Callyspongia</i> sp. collected off the coast of Hainan Island, China                                | Hybrids                           | [307] |
| 589      | <i>Neosartorya laciniosa</i> KUFC 7896 | Coastal forest soil, Samaersarn island, Chonburi Province, Thailand                                           | Meroditerpene                     | [296] |

| Compound | Producing strain                               | Strain source                                                                                   | Architectural feature       | Ref.  |
|----------|------------------------------------------------|-------------------------------------------------------------------------------------------------|-----------------------------|-------|
| 590      | <i>Penicillium</i> sp.<br>ZLN29                | Sediments collected,<br>Jiaozhou Bay, China                                                     | Penicillide derivative      | [308] |
| 591      | <i>Penicillium</i><br><i>Canescentia</i> MMS35 | Seawater sample gathered<br>on the French Atlantic<br>coast near the Loire River<br>estuary     | Chlorinated sesquiterpenoid | [309] |
| 592      | <i>Penicillium</i> sp. FJ-1                    | Marine plant of <i>Avicennia<br/>marina</i> , Fujian, China                                     | Hybrids                     | [220] |
| 593–594  | <i>Aspergillus terreus</i><br>OUCMDZ-1925      | Viscera of <i>C. haematocheilus</i><br>grown in the waters of the<br>Yellow River Delta         | Hybrids                     | [310] |
| 595–596  | <i>Aspergillus flavus</i><br>OUCMDZ-2205       | Prawn <i>Penaeus vannamei</i><br>from the Lianyungang Sea<br>area, Jiangsu Province of<br>China | Indole-diterpenoids         | [311] |
| 597      | <i>Stachybotrys</i> sp.<br>MF347               | Driftwood sample<br>collected at Helgoland,<br>North Sea, Germany                               | Hybrids                     | [312] |
| 598–600  | <i>Mucor irregularis</i><br>QEN-189            | Mangrove plant <i>Rhizophora<br/>stylosa</i> , Hainan Island,<br>China                          | Indole-diterpenes           | [313] |

#### 2.4.3. Hybrids of peptides and terpenoids (or isoprenyls)

|         |                                            |                                                                              |                                       |       |
|---------|--------------------------------------------|------------------------------------------------------------------------------|---------------------------------------|-------|
| 601     | <i>Aspergillus ustus</i><br>NSC-F038       |                                                                              | Hybrids                               | [314] |
| 602–604 | <i>Aspergillus</i> sp.                     | Mussel <i>Mytilus edulis</i> ,<br>Noto Peninsula, Sea of<br>Japan            | Indole alkaloids                      | [315] |
| 605     | <i>Aspergillus</i> sp.                     | Mussel <i>Mytilus edulis</i> ,<br>Noto Peninsula, Sea of<br>Japan            | Prenylated indole alkaloid            | [316] |
| 606–609 | <i>Aspergillus fumigatus</i>               | Holothurian <i>S. japonicus</i> ,<br>Lingshan Island, Qingdao,<br>China      | Prenylated indole<br>diketopiperazine | [317] |
| 610–612 | <i>Aspergillus sydowi</i><br>PFW1-13       | Driftwood sample beach of<br>Baishamen, Hainan, China                        | Diketopiperazine alkaloids            | [318] |
| 613     | <i>Aspergillus<br/>sclerotiorum</i> PT06-1 | Sediments collected in the<br>Putian salt field, Fujian<br>Province of China | Hybrids                               | [319] |

| Compound             | Producing strain                              | Strain source                                                      | Architectural feature                    |               | Ref.      |
|----------------------|-----------------------------------------------|--------------------------------------------------------------------|------------------------------------------|---------------|-----------|
| 614–615              | <i>Aspergillus fumigatus</i><br>YK-7          | Sea mud of intertidal zone collected from Yingkou, China           | Hybrids                                  |               | [320]     |
| 616–617              | <i>Aspergillus westerdijkiae</i><br>DFFSCS013 | Marine sediment sample collected in the South China Sea            | Prenylated indole alkaloids              |               | [321]     |
| 618                  | <i>Penicillium crustosum</i><br>HDN153086     | Antarctic sediment, Prydz Bay                                      | Hybrids                                  |               | [322]     |
| 2.4.4. Other hybrids |                                               |                                                                    |                                          |               |           |
| 619                  | <i>Penicillium citrinum</i>                   | Red alga <i>Actinotrichia fragilis</i> , Hedo Cape, Okinawa Island | Hybrids                                  |               | [323,324] |
| 620                  | <i>Gliocladium</i> sp.<br>YUP08               | Sea mud collected in Rushan, Shandong province, China              | Hybrids                                  |               | [325,326] |
| 621–622              | <i>Gliocladium</i> sp.<br>YUP08               | Sea mud collected in Rushan, Shandong province, China              | Piperazine-2,5-dione derivatives         |               | [326]     |
| 623                  | <i>Aspergillus effuses</i><br>H1-1            | The mud under mangroves along the coast of Fujian province, China  | Spiro-polyketide-diketopiperazine hybrid |               | [327]     |
| 624–625              | <i>Neosartorya fischeri</i>                   | Marine mud in the intertidal zone of Hainan Province of China      | Hybrids                                  |               | [328]     |
| 626                  | <i>Aspergillus versicolor</i><br>HDN08-60     | Sediments collected in the South China Sea                         | Hybrids                                  |               | [329]     |
| 2.5. Others          |                                               |                                                                    |                                          |               |           |
| 627–628              | <i>Penicillium</i> sp.                        | Marine alga <i>Enteromorpha Intestinalis</i>                       | Others                                   |               | [330]     |
| 629–630              | <i>Penicillium</i> sp.                        | Sponge <i>Axinella verrucosa</i> , Mediterranean Sea               | Others                                   |               | [331]     |
| 631                  | <i>Penicillium</i> sp.                        | Mangrove                                                           | Pyrrolyl alkaloid                        | 4-quinolinone | [332]     |
| 632                  | <i>Fusarium incarnatum</i> (HKI0504)          | Mangrove plant <i>Aegiceras corniculatum</i>                       | Others                                   |               | [125]     |
| 633                  | <i>Acremonium strictum</i>                    | Unidentified sponge collected from Korean waters                   | Others                                   |               | [333]     |
| 634                  | <i>Penicillium aurantiogriseum</i>            | Marine mud of the Bohai Sea                                        | Others                                   |               | [334]     |

| Compound | Producing strain                            | Strain source                                         | Architectural feature | Ref.  |
|----------|---------------------------------------------|-------------------------------------------------------|-----------------------|-------|
| 635      | <i>Penicillium</i> sp. F23-2                | Deep sea                                              | Others                | [159] |
| 636–637  | <i>Penicillium paneum</i><br>SD-44          | Sediment sample collected<br>from the South China Sea | Others                | [335] |
| 638–640  | <i>Aspergillus violaceus</i><br>WZXY-m64-17 | Sponge                                                | Others                | [336] |
| 641      | <i>Aspergillus terreus</i><br>[CFCC 81836]  |                                                       | Others                | [337] |
| 642      | <i>Aspergillus niger</i><br>BRF-074         | Sediments of the<br>Northeastern coast of<br>Brazil   | Others                | [338] |
